# Supplementary material for: Impact of socioeconomic inequalities on geographic disparities in cancer incidence: comparison of methods for spatial disease mapping
Source: PubMed Central journal article supplement (PMC5059978; doi:10.1186/s12874-016-0228-x), 2016-10-12

**a**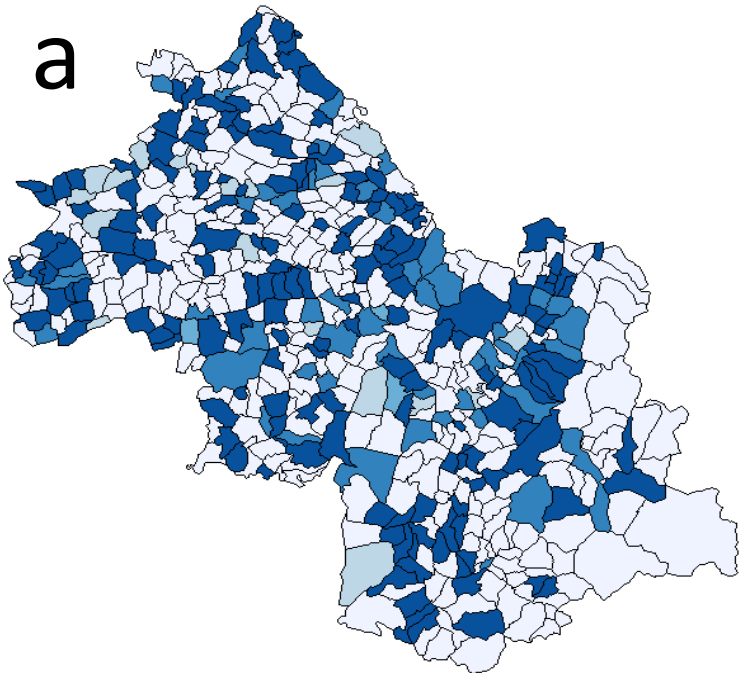**b**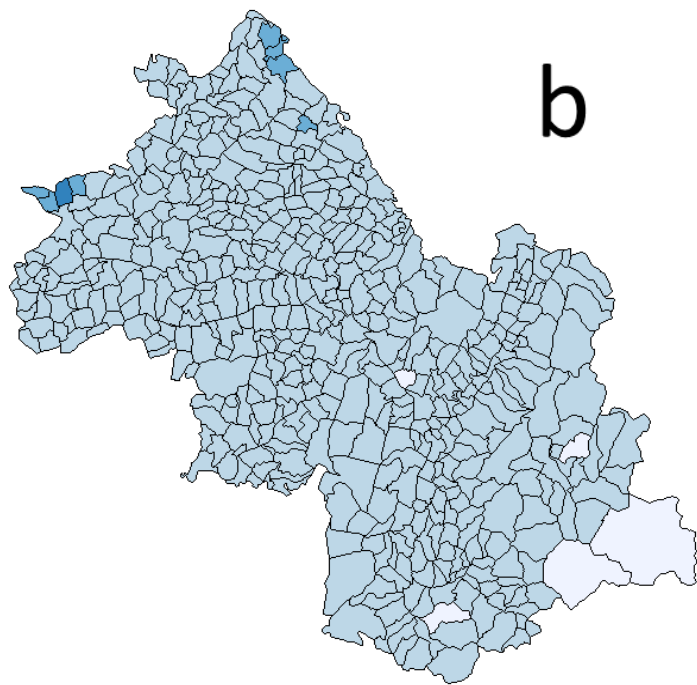**c**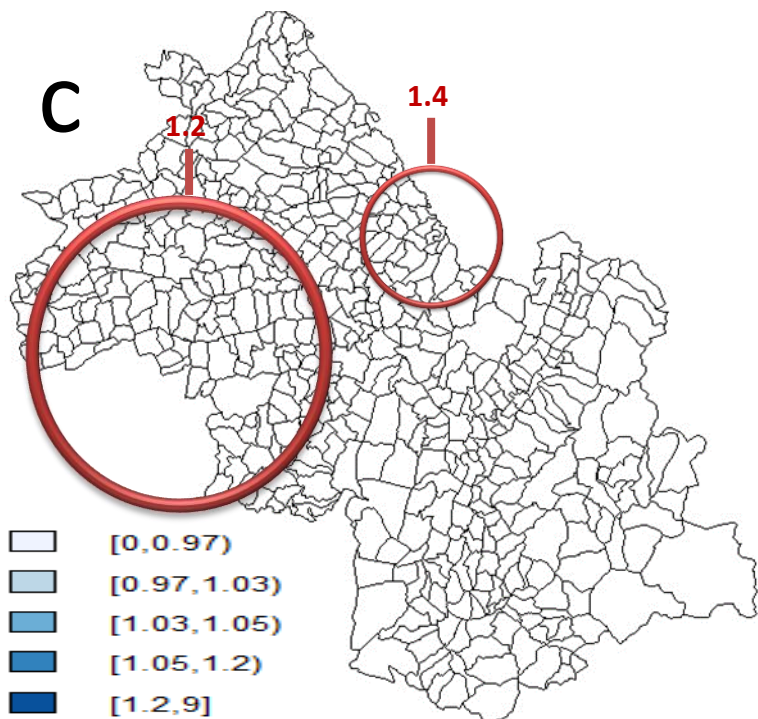**d**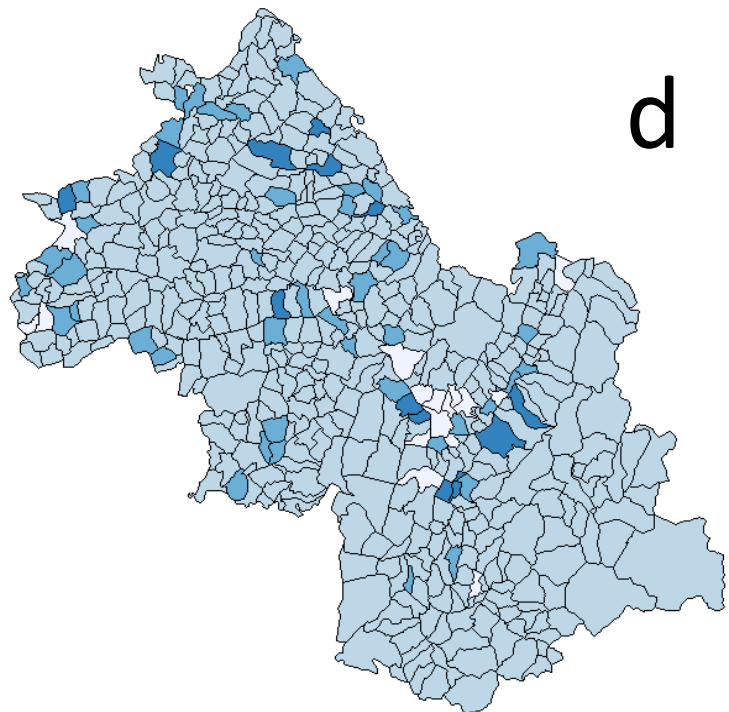

Supplement: 12874_2016_228_MOESM5_ESM.pdf [file 12874_2016_228_MOESM5_ESM.pdf]
