# Supplementary material for: Impact of socioeconomic inequalities on geographic disparities in cancer incidence: comparison of methods for spatial disease mapping
Source: Springer Nature journal article supplement (doi:10.1186/s12874-016-0228-x), 2016-10-12

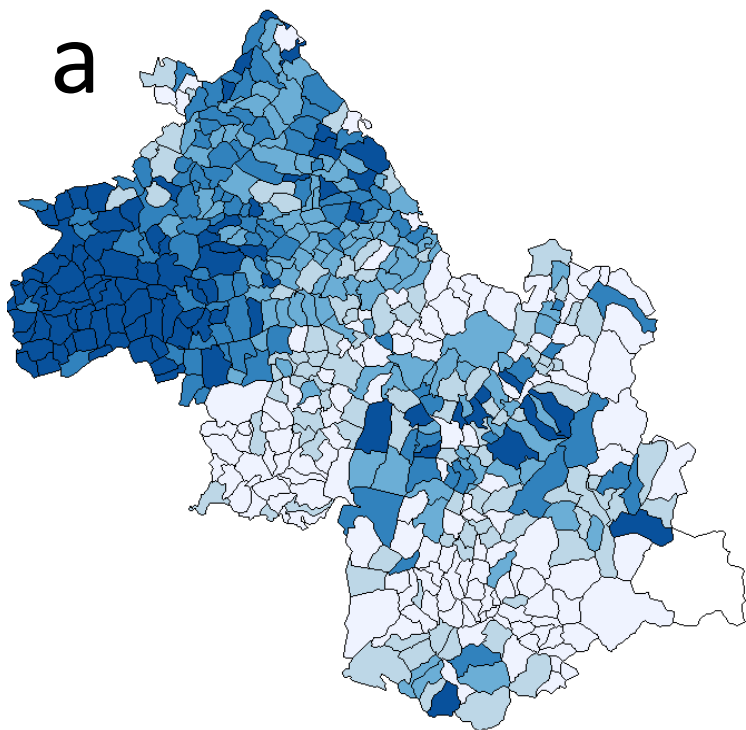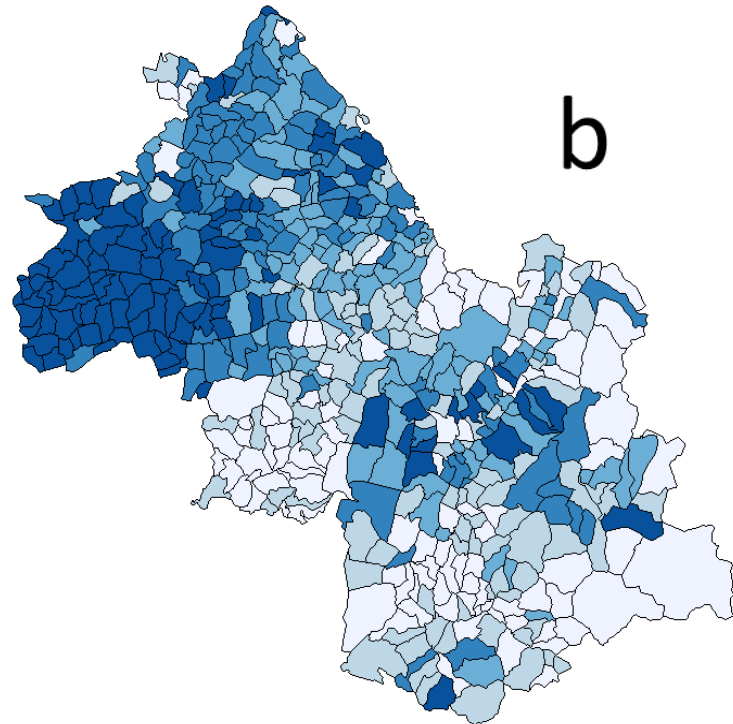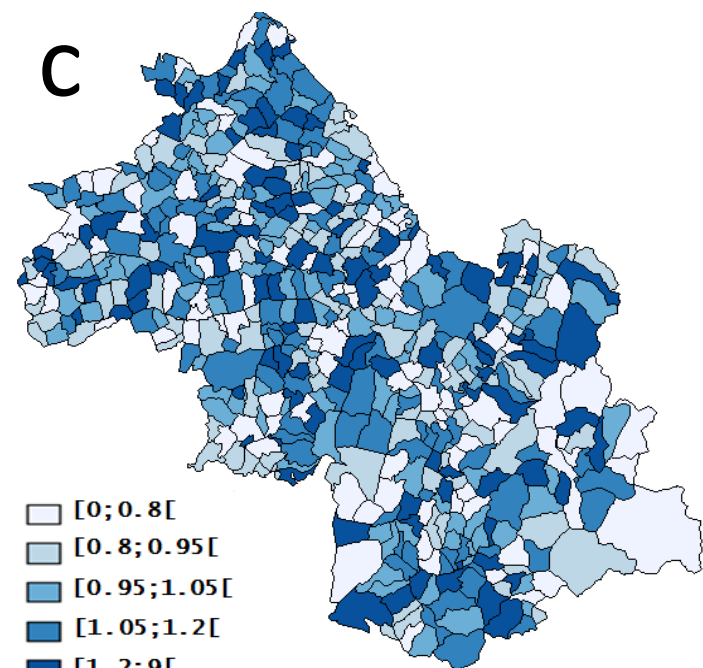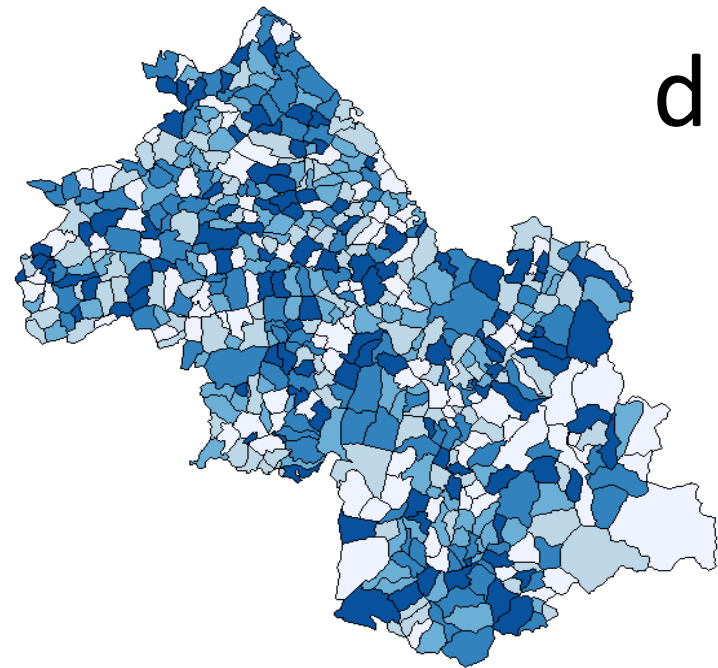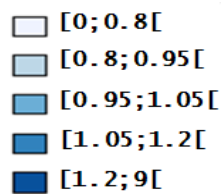

Supplement: MOESM2 [file 10864460]
